# Supplementary material for: Structure of the cytoplasmic ring of the Xenopus laevis nuclear pore complex by cryo-electron microscopy single particle analysis
Source: PubMed Central journal article supplement (PMC7264146; doi:10.1038/s41422-020-0319-4), 2020-05-06
Supplement: 41422_2020_319_MOESM7_ESM.pdf [file 41422_2020_319_MOESM7_ESM.pdf]

Supplementary information, Fig. S7

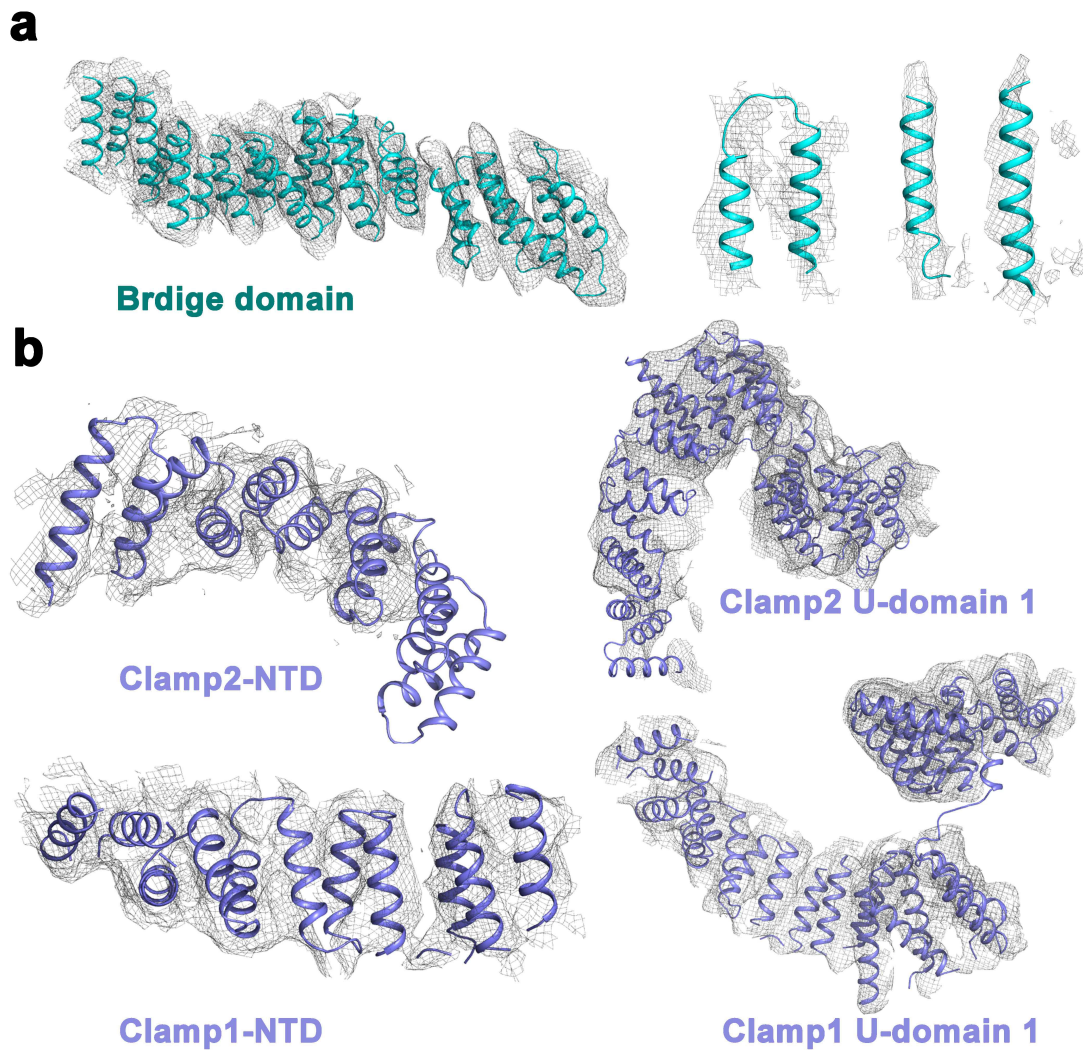

**Supplementary information, Fig. S7 | The EM density maps for the Nup358 complex.** **a**, The EM density maps for the bridge domain (left panel) and selected  $\alpha$ -helices from the bridge domain (right panel). **b**, Representative EM density maps for selected regions of the Nup358 complex. Shown here are the EM maps for the N-terminal helices of Clamp-1 and Clamp-2 and the U-domain from Clamp-1. All EM density maps in this figure were prepared using the masked Nup358-containing region map with a contour level between  $15\sigma$  and  $25\sigma$ .
