# Supplementary material for: Structure of the cytoplasmic ring of the Xenopus laevis nuclear pore complex by cryo-electron microscopy single particle analysis
Source: PubMed Central journal article supplement (PMC7264146; doi:10.1038/s41422-020-0319-4), 2020-05-06
Supplement: 41422_2020_319_MOESM8_ESM.pdf [file 41422_2020_319_MOESM8_ESM.pdf]

Supplementary information, Fig. S8

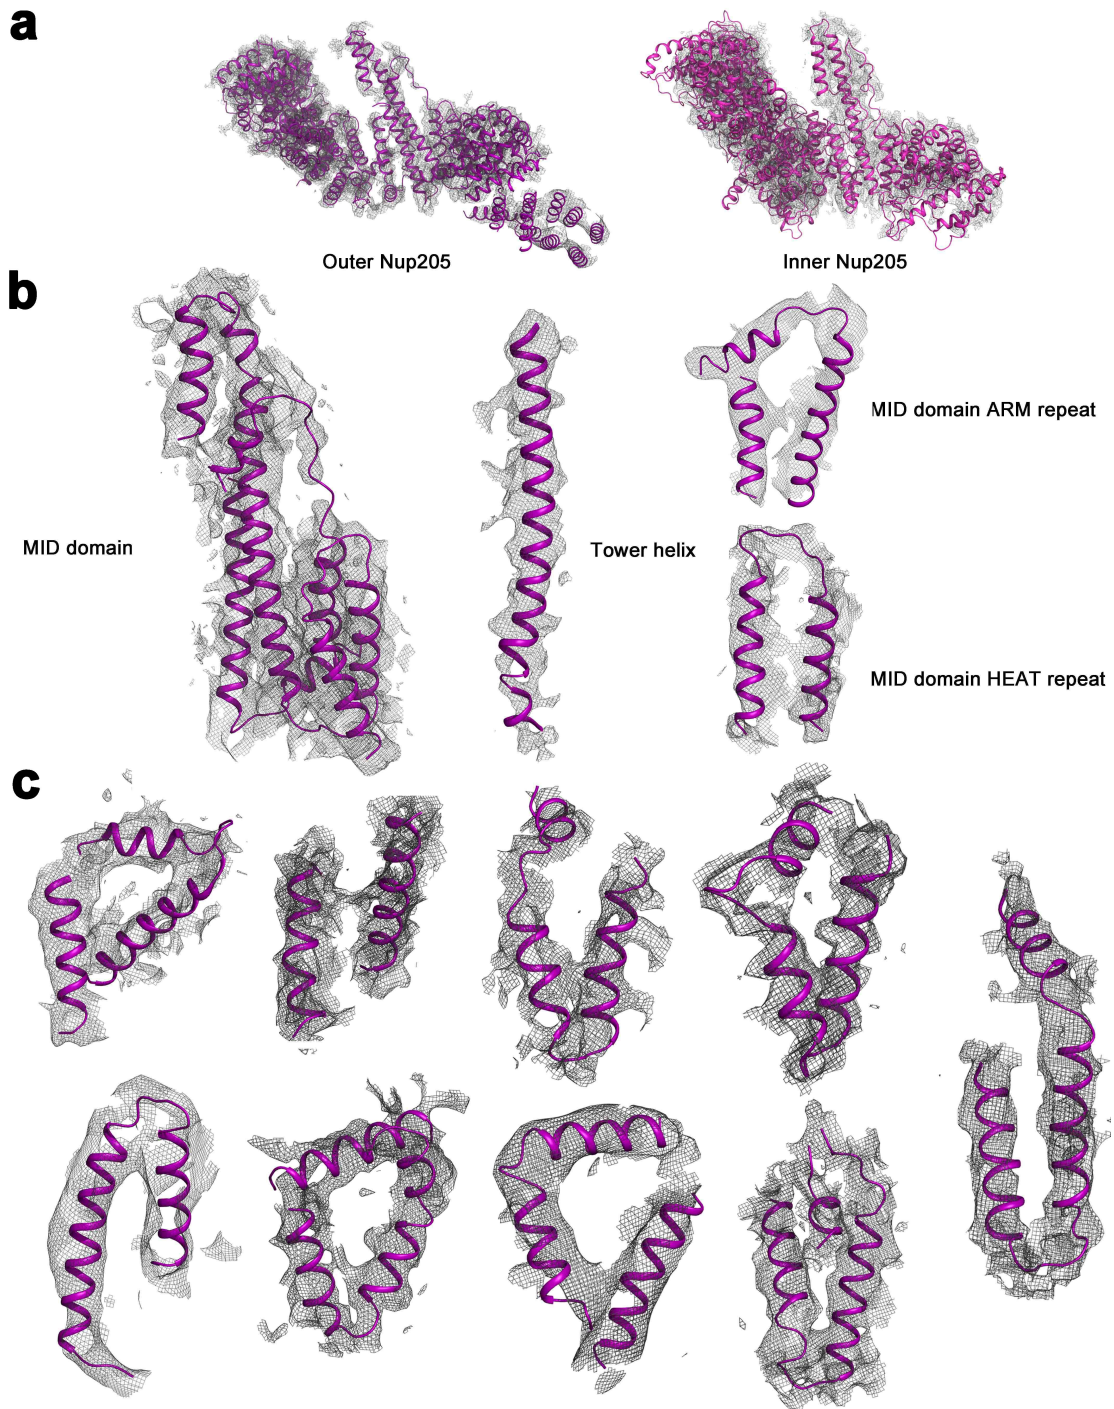

**Supplementary information, Fig. S8 | The EM density maps for Nup205.** **a**, The overall EM density maps for the outer and inner Nup205. **b**, The EM density maps for the MID domain of outer Nup205, which contains a characteristic Tower helix. The ARM repeat and HEAT repeat exhibit contrasting features for their EM density. **c**, Representative EM density maps for a number of discrete  $\alpha$ -helices of outer Nup205.

All EM density maps in this figure were prepared using the masked Core region map with a contour level between  $15\sigma$  and  $25\sigma$ .
