# Supplementary material for: Structure of the cytoplasmic ring of the Xenopus laevis nuclear pore complex by cryo-electron microscopy single particle analysis
Source: PubMed Central journal article supplement (PMC7264146; doi:10.1038/s41422-020-0319-4), 2020-05-06
Supplement: 41422_2020_319_MOESM13_ESM.pdf [file 41422_2020_319_MOESM13_ESM.pdf]

**Supplementary information, Table S1** | Statistics of cryo-EM data collection and analysis.

|                                                           |                                  |               |               |         |
|-----------------------------------------------------------|----------------------------------|---------------|---------------|---------|
| <b>Data collection</b>                                    |                                  |               |               |         |
| EM equipment                                              | Titan Krios                      |               |               |         |
| Voltage (kV)                                              | 300                              |               |               |         |
| Detector                                                  | Gatan K2                         |               |               |         |
| Energy filter                                             | Gatan GIF Quantum, 20 eV slit    |               |               |         |
| Pixel size (Å)                                            | 2.222                            |               |               |         |
| Magnification                                             | 22,502                           |               |               |         |
| Data set                                                  | Tilt0                            | Tilt30        | Tilt45        | Tilt55  |
| Exposure rate (e <sup>-</sup> /(s·Å <sup>2</sup> ))       | 2.612                            | 2.612         | 2.612         | 2.612   |
| Number of frames                                          | 40                               | 46            | 56            | 70      |
| Total Electron exposure (e <sup>-</sup> /Å <sup>2</sup> ) | 52                               | 60            | 78            | 91      |
| Defocus range (µm)                                        | -1.0 ~ -4.0                      |               |               |         |
| Total Number of images                                    | 4,606                            | 4,186         | 4,158         | 10,111  |
| Selected Number of images                                 | 3,250                            | 2,888         | 2,745         | 3,516   |
| Software                                                  | AutoEMation2                     |               |               |         |
| <b>Reconstruction</b>                                     |                                  |               |               |         |
| Software                                                  | RELION2.1/RELION3.0-beta/THUNDER |               |               |         |
| Number of used Particles                                  | 133,125                          | 198,099       | 142,938       | 142,385 |
| Symmetry/Final resolution (Å)                             | C1/8.0                           |               |               |         |
| Masked regions                                            | Core region                      | Nup358 region | Nup214 region |         |
| Number of Micrographs used                                | 12,399                           | 12,399        | 12,399        |         |
| Number of extracted particles                             | 1,721,077                        | 1,721,077     | 1,721,077     |         |
| Final number of particles                                 | 616,547                          | 387,233       | 552,066       |         |
| Unmasked Resolution (Å) (0.5/0.143)                       | 8.0/6.6                          | 9.2/7.9       | 9.3/7.9       |         |
| Masked Resolution (Å) (0.5/0.143)                         | 7.3/5.4                          | 8.4/6.7       | 8.8/7.6       |         |
| Local Resolution Ranges (Å)                               | 50-4.5                           | 50-5.0        | 50-6.1        |         |
| Resolution Range due to anisotropy (Å)                    | 6.2-5.0                          | 8.3-6.2       | 8.8-7.1       |         |
| Final Resolution (Å)                                      | 5.5                              | 7.1           | 7.9           |         |
| Map sharpening B-factor (Å <sup>2</sup> )                 | -200                             | -400          | -400          |         |
| Accuracy of rotation (°)                                  | 2.23                             | 2.55          | 5.02          |         |
| Accuracy of translation (pixels)                          | 0.99                             | 1.39          | 1.90          |         |
| EMDB number                                               | emd-0909                         | emd-0910      | emd-0911      |         |
| <b>Model building and refinement</b>                      |                                  |               |               |         |
| Model building software                                   | Coot                             |               |               |         |
| Refinement software                                       | PHENIX                           |               |               |         |
| Protein residues                                          | 16,161                           |               |               |         |
| Side chains                                               | N/A                              |               |               |         |
| <b>Validation</b>                                         |                                  |               |               |         |
| CaBLAM outliers                                           | 1.97%                            |               |               |         |

|                                  |       |       |       |
|----------------------------------|-------|-------|-------|
| PDB accession code               | 6LK8  |       |       |
| R.m.s deviations                 |       |       |       |
| Bonds length (Å)                 | 0.008 | 0.010 | 0.006 |
| Bonds Angle (°)                  | 1.23  | 1.21  | 1.04  |
| Ramachandran plot statistics (%) |       |       |       |
| Preferred                        | 88.66 | 85.33 | 87.70 |
| Allowed                          | 9.68  | 13.80 | 10.57 |
| Outlier                          | 1.66  | 0.87  | 1.73  |

---
