# Supplementary material for: Structure of the cytoplasmic ring of the Xenopus laevis nuclear pore complex by cryo-electron microscopy single particle analysis
Source: PubMed Central journal article supplement (PMC7264146; doi:10.1038/s41422-020-0319-4), 2020-05-06
Supplement: 41422_2020_319_MOESM14_ESM.pdf [file 41422_2020_319_MOESM14_ESM.pdf]

**Supplementary information, Table S2** | Summary of model building for the CR subunit of *X. laevis* NPC.

|                           | Molecule<br><b>Vertebrates/Yeasts</b> | Copy<br>No.        | Length<br><i>X. laevis</i> | UniProt No.<br><i>X. laevis</i>  | PDB code          | Modeling       | Model<br>length      | Resolution<br>(Å)              | Chain ID<br>Outer/Inner |      |
|---------------------------|---------------------------------------|--------------------|----------------------------|----------------------------------|-------------------|----------------|----------------------|--------------------------------|-------------------------|------|
| <b>Y<br/>complex</b>      | <b>Nup85/Nup85</b>                    | 2                  | 653                        | Q68FJ0                           | 3F3F,<br>4XMM     | HM             | ~600                 | 4.5~6.0                        | B/b                     |      |
|                           | <b>Nup160/Nup120</b>                  | 2                  | 1435                       | A0A1L8GIX3                       | 4GQ2,<br>4XMM     | HM             | ~1100                | 5.0~10.0                       | E/e                     |      |
|                           | <b>Nup96/Nup145C</b>                  | 2                  | 923                        | A0A1L8HBE3                       | 3IKO,<br>4XMM     | HM             | ~510                 | 4.5~6.0                        | G/g                     |      |
|                           |                                       |                    |                            | <b>Nup96N/160C</b>               | -                 | -              | PA                   | ~190                           | 4.5~6.0                 | L/l  |
|                           | <b>Nup107/Nup84</b>                   | 2                  | 916                        | A2RV69                           | 3IKO, 3I4R        | HM             | ~770                 | 5.0~7.0                        | I/i                     |      |
|                           | <b>Nup133/Nup133</b>                  | 2                  | 1140                       | A0A1L8H119                       | 1XKS, 3I4R        | HM             | ~1000                | 6.5~9.0                        | J/j                     |      |
|                           | <b>Sec13/Sec13</b>                    | 2                  | 320                        | Q7ZYJ8                           | 3BG1              | HM             | ~280                 | 4.5~6.0                        | H/h                     |      |
|                           | <b>Seh1/Seh1</b>                      | 2                  | 360                        | Q4FZW5/Q6GN<br>F1                | 3F3F              | HM             | ~310                 | 4.5~6.0                        | D/d                     |      |
|                           | <b>Nup43/-</b><br><b>Nup37/-</b>      | 2<br>2             | 375<br>326                 | Q05AW3<br>Q66IZ6                 | 4I79<br>4GQ2      | HM<br>HM       | ~370<br>~320         | 4.5~6.0<br>6.5~9.0             | C/c<br>F/f              |      |
| <b>Nup358</b>             | <b>Nup358/ -</b>                      | 4?                 | 2905                       | A0A1L8HGL2                       |                   |                | ~810                 | 6.0~12.5                       |                         |      |
|                           |                                       |                    |                            | <b>Bridge domain</b>             |                   |                |                      |                                |                         |      |
|                           |                                       |                    |                            | <b>Clamp-1</b><br><b>Clamp-2</b> | -<br>4GA0<br>4GA0 | PA<br>HM<br>HM | ~410<br>~200<br>~200 | 6.0~8.5<br>6.0~8.5<br>7.0~10.5 | Q<br>S<br>U             |      |
| <b>Nup205</b>             | <b>Nup205/Nup192</b>                  | 2                  | 2011                       | Q642R6                           | 5HB4              | HM             | ~1770                | 4.5~6.0                        | A/a                     |      |
|                           |                                       |                    |                            | <b>TAIL-C</b>                    |                   | PA             | ~150                 | 4.5~6.0                        | A/a                     |      |
| <b>Nup214<br/>complex</b> | <b>Nup214/Nup159</b>                  | 2?                 | 2037                       | Q9PVZ2                           | 5C3L              | PA             | ~90                  |                                | N                       |      |
|                           |                                       | <b>Nup88/Nup82</b> | 2?                         | 728                              | Q4KLQ6            | 5C3L,<br>5CWW  | PA                   | ~450                           | 7.5~10.5                | M, R |
|                           |                                       | <b>Nup62/Nsp1</b>  | 2?                         | 547                              | Q91349            | 5C3L           | PA                   | ~90                            |                         | O    |
|                           |                                       |                    |                            | <b>CCS2</b>                      | -                 | PA             | ~90                  | 7.5~10.5                       | X, Y, Z                 |      |

Under the column labeled “Molecule”, names of the proteins from vertebrates and yeasts are shown, with vertebrate components in bold. HM, homology modelling; PA, poly-alanine model. Nup96N/160C, the bridge domain of the Nup358 complex, TAIL-C of Nup205 and CCS2 of the Nup214 complex were *ab initio* modeled. The remaining components of Nup214 in the grey region were not docked in the EM density map.
